# Supplementary material for: A water stable Eu(iii)–organic framework as a recyclable multi-responsive luminescent sensor for efficient detection of p-aminophenol in simulated urine, and MnVII and CrVI anions in aqueous solutions
Source: Royal Society of Chemistry journal article supplement (doi:10.1039/d1dt00112d), 2021-01-01
Supplement: d1dt00112d1.pdf [file d1dt00112d1.pdf]

## Supporting Information

### Water stable Eu(III)-organic framework as a recyclable multi-responsive luminescent sensor for efficient detections of *p*-aminophenol in simulated urine, Mn<sup>VII</sup> and Cr<sup>VI</sup> anions in aqueous solution

Jiao-Jiao Zhao, Peng-Yu Liu, Li-Jun Song, Lei Zhang, Zhi-Liang Liu and Yan-Qin Wang\*

**Table S1.** The selected bond lengths (Å) and angles (°) for Eu-MOF-1.

| Parameter   | Value      | Parameter   | Value      |
|-------------|------------|-------------|------------|
| Eu1-O1      | 2.498(5)   | Eu1-O2      | 2.483(5)   |
| Eu1-O3B     | 2.379(5)   | Eu1-O4C     | 2.335(5)   |
| Eu1-O5D     | 2.392(5)   | Eu1-O6E     | 2.366(4)   |
| Eu1-O7      | 2.375(5)   | Eu1-O8      | 2.404(5)   |
| O2-Eu1-O1   | 52.22(16)  | O3B-Eu1-O1  | 85.02(17)  |
| O3B-Eu1-O2  | 130.06(18) | O3B-Eu1-O5C | 73.52(17)  |
| O3B-Eu1-O8  | 76.36(19)  | O4D-Eu1-O1  | 134.58(16) |
| O4D-Eu1-O2  | 85.03(17)  | O4D-Eu1-O3B | 120.40(16) |
| O4D-Eu1-O5C | 75.21(17)  | O4D-Eu1-O6E | 76.93(17)  |
| O4D-Eu1-O7  | 79.28(18)  | O4D-Eu1-O8  | 144.40(18) |
| O5C-Eu1-O1  | 77.87(18)  | O5C-Eu1-O2  | 73.23(18)  |
| O5C-Eu1-O8  | 139.7(2)   | O6E-Eu1-O1  | 148.28(16) |
| O6E-Eu1-O2  | 151.18(17) | O6E-Eu1-O3B | 78.74(18)  |
| O6E-Eu1-O5C | 122.08(17) | O6E-Eu1-O7  | 80.84(19)  |
| O6E-Eu1-O8  | 76.30(19)  | O7-Eu1-O1   | 99.45(19)  |
| O7-Eu1-O2   | 73.77(19)  | O7-Eu1-O3B  | 146.90(18) |
| O7-Eu1-O5C  | 139.56(18) | O7-Eu1-O8   | 73.7(2)    |
| O8-Eu1-O1   | 73.46(18)  | O8-Eu1-O2   | 108.5(2)   |

Symmetry transformations used to generate equivalent atoms: A: 1-x, 1-y, 1-z; B: 1/2-x, 1-y, 1/2+z; C: 1/2+x, +y, 1/2-z; D: 1/2-x, -1/2+y, +z; E: 1/2+x, 3/2-y, 1-z.

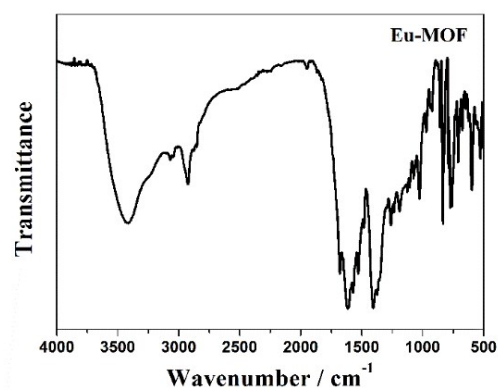

**Fig. S1** The IR spectrum for Eu-MOF-1.

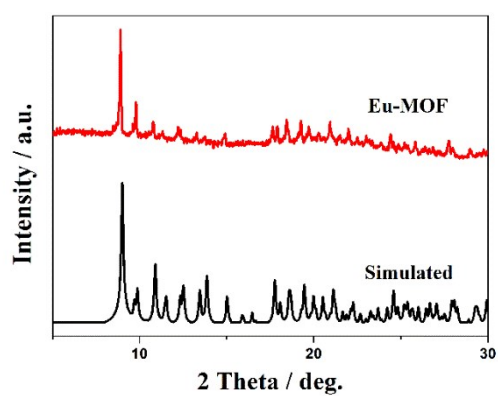

**Fig. S2** The PXRD patterns for Eu-MOF-1.

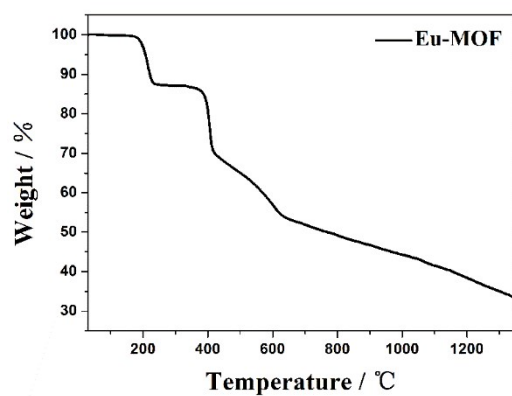

**Fig. S3** The TGA curve for Eu-MOF-1.

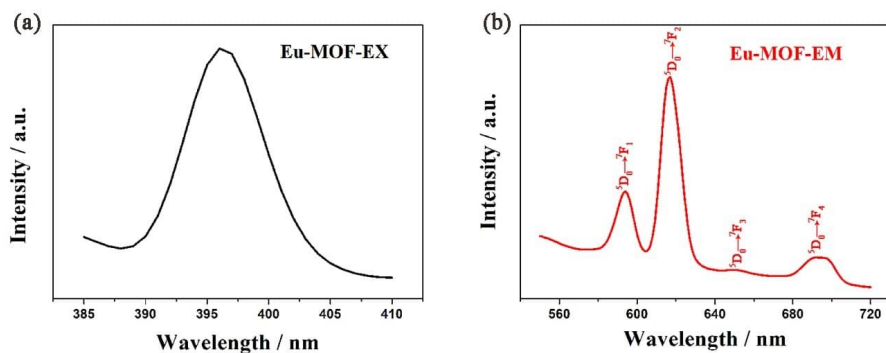

Fig. S4 The solid-state excitation and emission spectra of Eu-MOF-1 at room temperature.

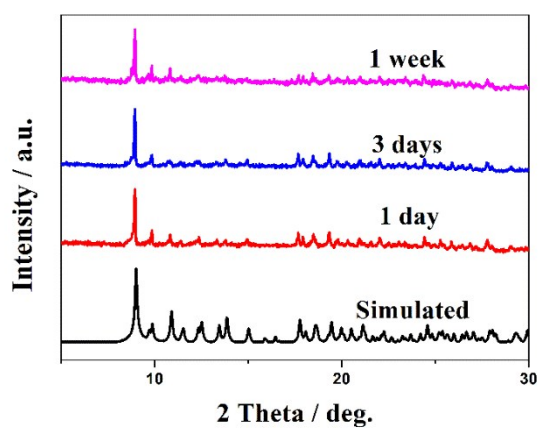

Fig. S5 PXRD patterns of Eu-MOF-1 after immersing in water for one day, three days and one week.

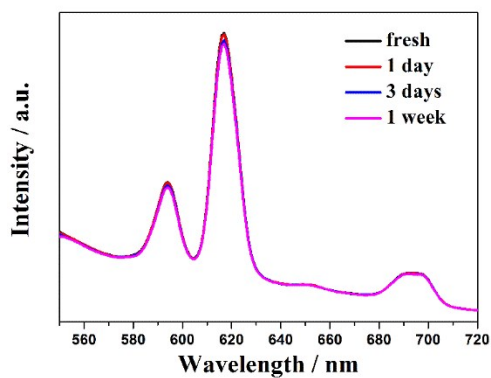

Fig. S6 Day-to-day fluorescence stability of Eu-MOF-1.

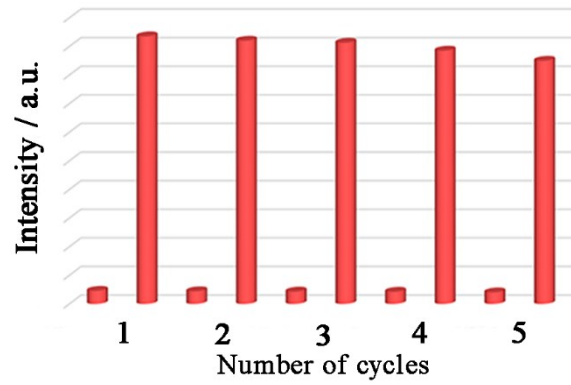

Fig. S7 Five cycles test of Eu-MOF-1 toward sensing PAP.

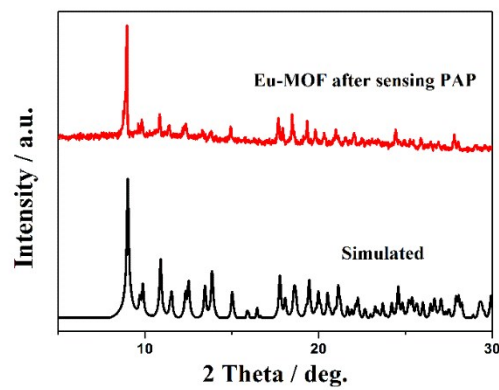

Fig. S8 PXRD patterns of Eu-MOF-1 and Eu-MOF-1 immersed in PAP aqueous solution.

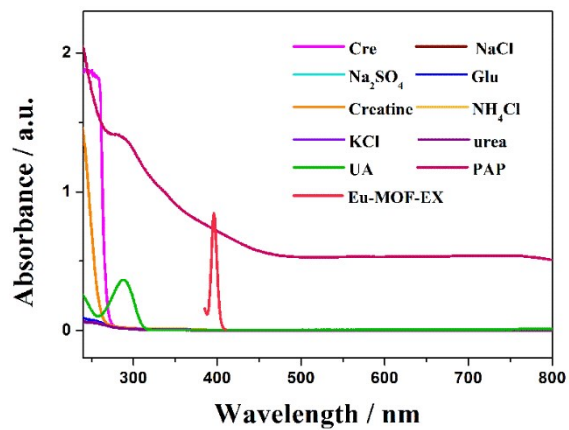

Fig. S9 UV-vis absorption spectra of urea, Glu, NaCl, Cre, Na<sub>2</sub>SO<sub>4</sub>, UA, KCl, creatine, NH<sub>4</sub>Cl and PAP and the excitation spectrum of Eu-MOF-1.

**Table S2.** Comparison of the analytical parameters between the previously reported sensors and Eu-MOF-1.

| Material                                                                        | Analyte                                      | $K_{sv}$ ( $M^{-1}$ ) | LOD (mol/L)           | Ref       |
|---------------------------------------------------------------------------------|----------------------------------------------|-----------------------|-----------------------|-----------|
| [Zn <sub>3</sub> (L)(OH)(H <sub>2</sub> O) <sub>5</sub> ]·NMP·2H <sub>2</sub> O | MnO <sub>4</sub> <sup>-</sup>                | $1.1 \times 10^4$     | $3.38 \times 10^{-4}$ | 1         |
| [Cd(L) <sub>2</sub> (H <sub>2</sub> O) <sub>2</sub> ]                           | MnO <sub>4</sub> <sup>-</sup>                | $2.2 \times 10^4$     | $1.73 \times 10^{-4}$ | 2         |
| 534-MOF-Tb                                                                      | MnO <sub>4</sub> <sup>-</sup>                | $6.63 \times 10^4$    | $3.4 \times 10^{-4}$  | 3         |
| [Co(NPDC)(bpee)]·DMF·2H <sub>2</sub> O                                          | MnO <sub>4</sub> <sup>-</sup>                | $4.26 \times 10^3$    | $1.5 \times 10^{-6}$  | 4         |
| CDs@MOF(Eu)                                                                     | MnO <sub>4</sub> <sup>-</sup>                | $3.641 \times 10^4$   | $6.8 \times 10^{-7}$  | 5         |
| Eu-MOF-1                                                                        | MnO <sub>4</sub> <sup>-</sup>                | $4.828 \times 10^4$   | $8.08 \times 10^{-6}$ | This work |
| [Zn <sub>3</sub> (L)(OH)(H <sub>2</sub> O) <sub>5</sub> ]·NMP·2H <sub>2</sub> O | CrO <sub>4</sub> <sup>2-</sup>               | $1.3 \times 10^4$     | $4.29 \times 10^{-4}$ | 1         |
| [Cd(L) <sub>2</sub> (H <sub>2</sub> O) <sub>2</sub> ]                           | CrO <sub>4</sub> <sup>2-</sup>               | $1.1 \times 10^4$     | $1.75 \times 10^{-4}$ | 2         |
| [Zn <sub>2</sub> (TPOM)(NDC) <sub>2</sub> ]·3.5H <sub>2</sub> O                 | CrO <sub>4</sub> <sup>2-</sup>               | $7.81 \times 10^3$    | $2.5 \times 10^{-6}$  | 6         |
| [Tb(L)(HCOO)(H <sub>2</sub> O)]                                                 | CrO <sub>4</sub> <sup>2-</sup>               | $1.3 \times 10^3$     | $1.8 \times 10^{-6}$  | 7         |
| Eu-MOF-1                                                                        | CrO <sub>4</sub> <sup>2-</sup>               | $5.339 \times 10^4$   | $7.30 \times 10^{-6}$ | This work |
| [Zn <sub>3</sub> (L)(OH)(H <sub>2</sub> O) <sub>5</sub> ]·NMP·2H <sub>2</sub> O | Cr <sub>2</sub> O <sub>7</sub> <sup>2-</sup> | $6.6 \times 10^4$     | $6.05 \times 10^{-5}$ | 1         |
| [Cd(L) <sub>2</sub> (H <sub>2</sub> O) <sub>2</sub> ]                           | Cr <sub>2</sub> O <sub>7</sub> <sup>2-</sup> | $5.1 \times 10^4$     | $3.41 \times 10^{-5}$ | 2         |
| 534-MOF-Tb                                                                      | Cr <sub>2</sub> O <sub>7</sub> <sup>2-</sup> | $1.37 \times 10^4$    | $1.4 \times 10^{-4}$  | 3         |
| [Eu <sub>2</sub> L <sub>1.5</sub> (H <sub>2</sub> O) <sub>2</sub> EtOH]·DMF     | Cr <sub>2</sub> O <sub>7</sub> <sup>2-</sup> | $1.526 \times 10^3$   | $1 \times 10^{-5}$    | 8         |
| [Eu(L)(H <sub>2</sub> O)]·1.5H <sub>2</sub> O                                   | Cr <sub>2</sub> O <sub>7</sub> <sup>2-</sup> | $5.18 \times 10^4$    | $1.25 \times 10^{-6}$ | 9         |
| [Tb(TATAB)(H <sub>2</sub> O) <sub>2</sub> ]·NMP·H <sub>2</sub> O                | Cr <sub>2</sub> O <sub>7</sub> <sup>2-</sup> | $1.11 \times 10^4$    | $5 \times 10^{-6}$    | 10        |
| Eu-MOF-1                                                                        | Cr <sub>2</sub> O <sub>7</sub> <sup>2-</sup> | $5.722 \times 10^4$   | $6.29 \times 10^{-6}$ | This work |

H<sub>5</sub>L = 2,4-di(3',5'-dicarboxylphenyl)benzoic acid;<sup>1</sup> HL = 5-(triazol-1-yl)nicotinic acid;<sup>2</sup> H<sub>3</sub>TBOT = (2,4,6-tris[1-(3-carboxylphenoxy)ylmethyl]mesitylene);<sup>3</sup> H<sub>2</sub>NPDC = 2-nitro-1,4-phenylenedicarboxylate, bpee = 1,2-bis(4-bipyridyl)ethylene;<sup>4</sup> CDs = ethanediamine-modified carbon dots;<sup>5</sup> H<sub>2</sub>L = 5-((2'-cyano-[1,1'-biphenyl]-4-yl)methoxy)isophthalic acid;<sup>6</sup> TPOM = tetrakis(4-pyridyloxymethylene)methane, H<sub>2</sub>ndc = 2,6-naphthalenedicarboxylic acid;<sup>7</sup> L = 5,5'-(carbonylbis(azanediy))diisophthalic acid;<sup>8</sup> H<sub>3</sub>L = 3-(3,5-dicarboxylatobenzyloxy)benzoic acid;<sup>9</sup> H<sub>3</sub>TATAB = 4,4',4''-s-triazine-1,3,5-triyltri-*m*-aminobenzoic acid.<sup>10</sup>

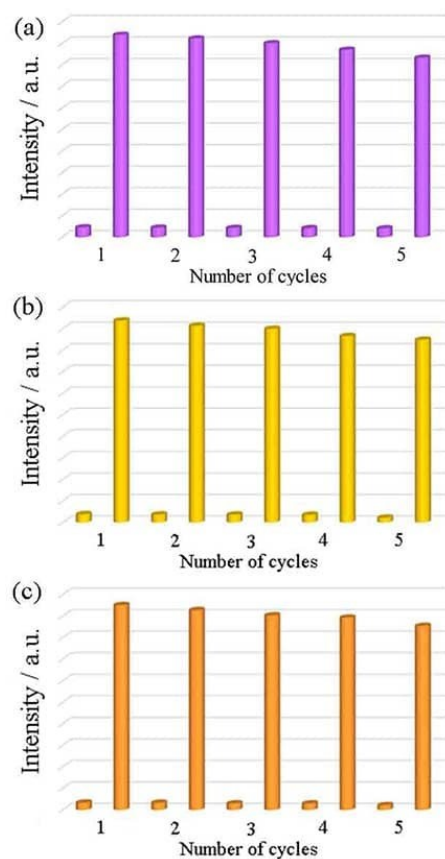

**Fig. S10** Five cycles test of Eu-MOF-1 toward sensing MnO<sub>4</sub><sup>-</sup> (a), CrO<sub>4</sub><sup>2-</sup> (b) and Cr<sub>2</sub>O<sub>7</sub><sup>2-</sup> (c).

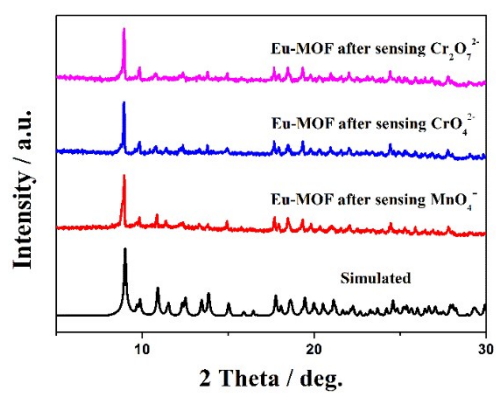

**Fig. S11** PXRD patterns of Eu-MOF-1 and Eu-MOF-1 immersed in MnO<sub>4</sub><sup>-</sup>, CrO<sub>4</sub><sup>2-</sup> and Cr<sub>2</sub>O<sub>7</sub><sup>2-</sup> aqueous solutions.

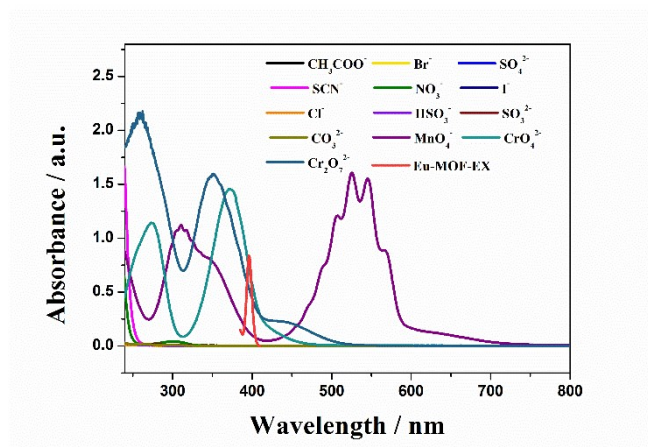

**Fig. S12** The UV-vis spectra of different anions in aqueous solutions and excitation spectrum of Eu-MOF-1.

- 1 Y. T. Yan, W. Y. Zhang, F. Zhang, F. Cao, R. F. Yang, Y. Y. Wang and L. Hou, *Dalton Trans.*, 2018, **47**, 1682.
- 2 Y. T. Yan, F. Cao, W. Y. Zhang, S. S. Zhang, F. Zhang and Y. Y. Wang, *New J. Chem.*, 2018, **42**, 9865.
- 3 M. Chen, W. M. Xu, J. Y. Tian, H. Cui, J. X. Zhang, C. S. Liu and M. Du, *J. Mater. Chem. C*, 2017, **5**, 2015.
- 4 F. Li, Y. S. Hong, K. X. Zuo, Q. Sun and E. Q. Gao, *J. Solid State Chem.*, 2019, **270**, 509.
- 5 X. Fu, R. Lv, J. Su, H. Li, B. Yang, W. Gu and X. Liu, *RSC. Adv.*, 2018, **8**, 4766.
- 6 R. Lv, H. Li, J. Su, X. Fu, B. Y. Yang, W. Gu and X. Liu, *Inorg. Chem.*, 2017, **56**, 12348.
- 7 Z. Sun, M. Yang, Y. Ma, and L. C. Li, *Cryst. Growth Des.*, 2017, **17**, 4326.
- 8 W. Liu, X. Huang, C. Xu, C. Chen, L. Yang, W. Dou, W. Chen, H. Yang and W. Liu, *Chem. Eur. J.*, 2016, **22**, 18769.
- 9 Y. Tao, P. Zhang, J. Liu, X. Chen, X. Guo, H. Jin, J. Chai, L. Wang and Y. Fan, *New. J. Chem.*, 2018, **42**, 19485.
- 10 G. X. Wen, M. L. Han, X. Q. Wu, Y. P. Wu, W. W. Dong, J. Zhao, D. S. Li and L. F. Ma, *Dalton. Trans.*, 2016, **45**, 15492.
